# Supplementary material for: Air pollution (PM 2.5 ) and its meteorology predictors in Kampala and Jinja cities, in Uganda
Source: Royal Society of Chemistry journal article supplement (doi:10.1039/d4ea00074a), 2024-01-01
Supplement: d4ea00074a1.pdf [file d4ea00074a1.pdf]

## Supplementary Data

### 2.0 Supplementary Data: Method

#### 2.4 Data Preprocessing

The raw data from AirQo and TAHMO for PM<sub>2.5</sub> and meteorological variables were processed and prepared for subsequent analysis. The data manipulation and pre-processing were performed using Python version 3.10.11(73) and several libraries, including Pandas version 2.0.2, NumPy version 1.23.5, and Matplotlib version 3.7.0.

##### 2.4.1 PM<sub>2.5</sub> Data Preprocessing

The PM<sub>2.5</sub> data obtained from AirQo for Jinja and Kampala were analysed using separate Jupyter notebooks. Each dataset contained hourly timestamp information, PM<sub>2.5</sub> raw values, PM<sub>2.5</sub> calibrated values, and site names. Jinja had seven sites where the AirQo sensors were deployed, while Kampala had 55 unique sites. The detailed sites where the AirQo sensors were deployed in the two cities are presented in Table 1.

Only data from January 2020 to December 2022 were considered to ensure consistency and reliability. Data from 2019 were excluded due to limited availability and potential data inconsistencies. The next step involved averaging the hourly PM<sub>2.5</sub> data across all sites within each city, resulting in city-level PM<sub>2.5</sub> concentrations. This aggregation was performed because the analysis focused on the overall PM<sub>2.5</sub> levels in each city.

After this, the percentage of missing values was calculated for both Jinja and Kampala datasets. The missing data statistics are recorded in Table 2. The Multiple Imputation by Chained Equation (MICE) algorithm was utilized to impute the missing values. MICE is a multivariate imputation method that takes into account the relationships among variables in the dataset. It generates multiple plausible imputations for missing values by fitting regression models for the incomplete variable using the remaining variables as predictors(74). The imputation process is performed iteratively, resulting in a completed dataset with imputed values. MICE is particularly useful in handling missing data and can handle missingness up to 30%(75, 76).

### 2.4.2 Meteorological Data Preprocessing

The raw meteorological data obtained from TAHMO for Jinja and Kampala were analysed using separate Jupyter notebooks. Each dataset contained hourly meteorological measurements of atmospheric pressure (kPA), precipitation (mm), temperature average (°C), wind gusts max (m/s), wind speed(m/s), and relative humidity. To ensure consistency with the PM<sub>2.5</sub> data, only data from January 2020 to December 2022 were considered, excluding 2019. Some meteorological parameters, including radiation average (W/m), temperature min (°C), temperature max (degrees Celsius), and wind direction (°), were excluded from the datasets as they were deemed unnecessary for the analysis. The percentage of missing values was calculated to handle missing data in the meteorological datasets, similar to the PM<sub>2.5</sub> data. The missing data statistics are presented in Table 2. The MICE algorithm was then employed to impute the missing values, ensuring a comprehensive dataset for subsequent analysis.

### 2.4.3 Integration of PM<sub>2.5</sub> and Meteorological Data

After completing the individual pre-processing steps for both cities' PM<sub>2.5</sub> and meteorological data, the datasets were joined on the timestamps. The integrated dataset now consisted of PM<sub>2.5</sub> calibrated values and the various meteorological variables aligned in time, providing a comprehensive dataset for further analysis. The final dataset contained a matrix of 26,304 rows x 8 columns.

#### Supplementary File SF 1: Sites of AirQo devices in Kampala and Jinja.

| City    | Sites                                                                                                                                                                                                                                                                                                                                                                                                                     |
|---------|---------------------------------------------------------------------------------------------------------------------------------------------------------------------------------------------------------------------------------------------------------------------------------------------------------------------------------------------------------------------------------------------------------------------------|
| Jinja   | Jinja Main Street, Kimaka, City Council, Walukuba East, Mpumudde, Rubaga Ward, YMCA                                                                                                                                                                                                                                                                                                                                       |
| Kampala | Civic Centre Kampala Central', Bugolobi Nakawa, Rubaga Kampala, Kasubi Rubaga, Bukasa Kira Municipality, Bukoto I Kawempe, Nsambya/US Embassy Makindye, Kalerwe, Kawempe, Butabika Nakawa, Kiwatule Nakawa, Makerere University_01 Kawempe, Nakasero II Kampala, Mbuya II Nakawa, Banda Kampala, Luwafu Makindye, Ntinda Nakawa, Makerere University Weather Station, Bahai Kawempe, Kawempe Industrial Kawempe, Mpererwe |

|  |                                                                                                                                                                                                                                                                                                                                                                                                                                                                                                                                                                                                                                                                                                                  |
|--|------------------------------------------------------------------------------------------------------------------------------------------------------------------------------------------------------------------------------------------------------------------------------------------------------------------------------------------------------------------------------------------------------------------------------------------------------------------------------------------------------------------------------------------------------------------------------------------------------------------------------------------------------------------------------------------------------------------|
|  | Kawempe, Kyanja Nakawa, Luzira Nakawa, Rubaga, Kampala Central, Makindye, Kyebando Kawempe, Kawempe, Nakawa, Kampala Central, Makerere, Kawempe, Lower Nsooba, Kawempe, Nakawa, Nakawa, Makindye Lukuli Makindye, Lukuli Makindye, Makindye Nsambya/US Embassy, Busega Rubaga, Makindye KCCA division offices, Kibuli Makindye, Kizungu, Makindye, Ggaba Makindye, St.Ponsiano primary school Makindye, wabigalo, Kansanga Seed Secondary School, Kampala Uganda, Muyenga tank hill ,makindye, Kabalagala town Makindye, Katwe 1, Makindye, Kayan Test Site , Naguru II Nakawa, Kisugu Makindye, Kyebando Kampala, Rubaga Div Rubaga, Katwe 1 Makindye, Muyenga tank hill, Makindye, City parents primary school |
|--|------------------------------------------------------------------------------------------------------------------------------------------------------------------------------------------------------------------------------------------------------------------------------------------------------------------------------------------------------------------------------------------------------------------------------------------------------------------------------------------------------------------------------------------------------------------------------------------------------------------------------------------------------------------------------------------------------------------|

**Supplementary File SF 2: Missing Data Statistics for PM<sub>2.5</sub> and Meteorological Parameters in Kampala and Jinja**

| Study city | Percentage of Missing Data for each Parameter (in %) |                      |               |                   |                     |            | Wind gusts |
|------------|------------------------------------------------------|----------------------|---------------|-------------------|---------------------|------------|------------|
|            | PM <sub>2.5</sub>                                    | Atmospheric Pressure | Precipitation | Relative Humidity | Average Temperature | Wind speed |            |
| Kampala    | 16.54                                                | 15.37                | 0.00          | 15.43             | 15.37               | 16.29      | 16.29      |
| Jinja      | 24.86                                                | 12.59                | 23.15         | 12.61             | 12.57               | 19.31      | 19.31      |

Since the imputation is based on neighbouring values and a significant number of data points were missing in that period, the imputation resorted to using the mean value, resulting in a flat trend. To reduce the noise in the dataset and provide a clearer depiction of the trend, a 30-day moving average was calculated, as shown in Figure 5.

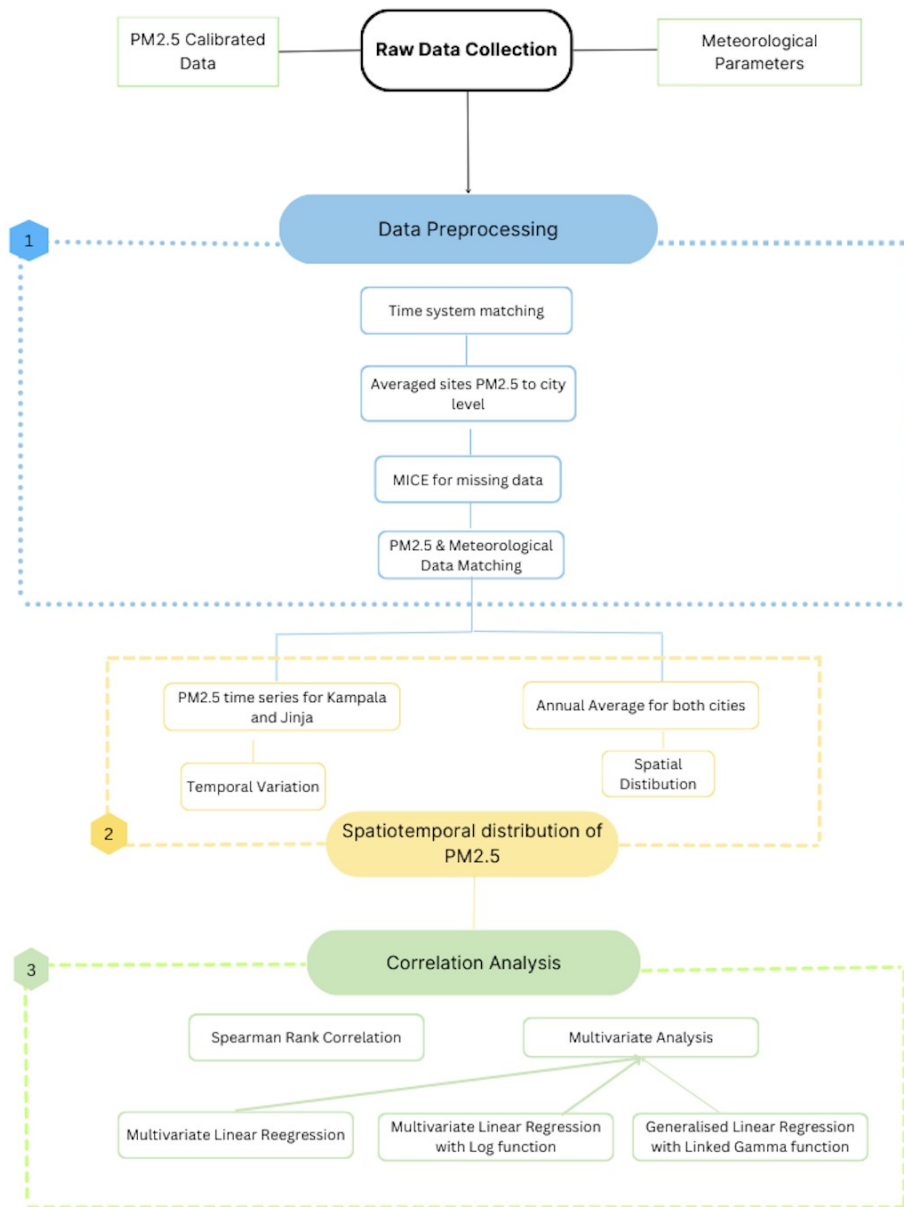

**Supplementary File SF 3: Flowchart of the study methodology**

## Supplementary data: Complete Model Results

### MULTIVARIATE LINEAR REGRESSION

#### Kampala

| OLS Regression Results |                        |                     |             |       |         |         |
|------------------------|------------------------|---------------------|-------------|-------|---------|---------|
| Dep. Variable:         | pm2_5_calibrated_value | R-squared:          | 0.169       |       |         |         |
| Model:                 | OLS                    | Adj. R-squared:     | 0.169       |       |         |         |
| Method:                | Least Squares          | F-statistic:        | 1339.       |       |         |         |
| Date:                  | Sat, 15 Jul 2023       | Prob (F-statistic): | 0.00        |       |         |         |
| Time:                  | 00:52:06               | Log-Likelihood:     | -1.1217e+05 |       |         |         |
| No. Observations:      | 26304                  | AIC:                | 2.244e+05   |       |         |         |
| Df Residuals:          | 26299                  | BIC:                | 2.244e+05   |       |         |         |
| Df Model:              | 4                      |                     |             |       |         |         |
| Covariance Type:       | nonrobust              |                     |             |       |         |         |
|                        | coef                   | std err             | t           | P> t  | [0.025  | 0.975]  |
| const                  | 208.6426               | 3.015               | 69.206      | 0.000 | 202.733 | 214.552 |
| precipitation          | -0.5126                | 0.091               | -5.655      | 0.000 | -0.690  | -0.335  |
| humidity               | -86.8701               | 1.754               | -49.527     | 0.000 | -90.308 | -83.432 |
| temp_mean              | -3.9473                | 0.080               | -49.170     | 0.000 | -4.105  | -3.790  |
| wind_speed             | -16.3943               | 0.413               | -39.711     | 0.000 | -17.203 | -15.585 |
| Omnibus:               | 6112.635               | Durbin-Watson:      | 0.233       |       |         |         |
| Prob(Omnibus):         | 0.000                  | Jarque-Bera (JB):   | 16854.350   |       |         |         |
| Skew:                  | 1.236                  | Prob(JB):           | 0.00        |       |         |         |
| Kurtosis:              | 6.044                  | Cond. No.           | 724.        |       |         |         |

#### Jinja

| OLS Regression Results |                        |                     |             |       |         |         |
|------------------------|------------------------|---------------------|-------------|-------|---------|---------|
| Dep. Variable:         | pm2_5_calibrated_value | R-squared:          | 0.064       |       |         |         |
| Model:                 | OLS                    | Adj. R-squared:     | 0.064       |       |         |         |
| Method:                | Least Squares          | F-statistic:        | 450.2       |       |         |         |
| Date:                  | Sat, 15 Jul 2023       | Prob (F-statistic): | 0.00        |       |         |         |
| Time:                  | 00:48:46               | Log-Likelihood:     | -1.0556e+05 |       |         |         |
| No. Observations:      | 26304                  | AIC:                | 2.111e+05   |       |         |         |
| Df Residuals:          | 26299                  | BIC:                | 2.112e+05   |       |         |         |
| Df Model:              | 4                      |                     |             |       |         |         |
| Covariance Type:       | nonrobust              |                     |             |       |         |         |
|                        | coef                   | std err             | t           | P> t  | [0.025  | 0.975]  |
| const                  | 102.9843               | 2.187               | 47.081      | 0.000 | 98.697  | 107.272 |
| precipitation          | -0.7912                | 0.079               | -10.056     | 0.000 | -0.945  | -0.637  |
| humidity               | -40.1345               | 1.376               | -29.171     | 0.000 | -42.831 | -37.438 |
| temp_mean              | -2.1865                | 0.055               | -40.064     | 0.000 | -2.293  | -2.080  |
| wind_speed             | 0.7491                 | 0.074               | 10.128      | 0.000 | 0.604   | 0.894   |
| Omnibus:               | 16282.613              | Durbin-Watson:      | 0.535       |       |         |         |
| Prob(Omnibus):         | 0.000                  | Jarque-Bera (JB):   | 294530.187  |       |         |         |
| Skew:                  | 2.668                  | Prob(JB):           | 0.00        |       |         |         |
| Kurtosis:              | 18.501                 | Cond. No.           | 710.        |       |         |         |

# MULTIVARIATE LINEAR REGRESSION WITH LOG OF TARGET VARIABLE

## Kampala

OLS Regression Results

```

=====
Dep. Variable:  pm2_5_calibrated_value  R-squared:      0.177
Model:          OLS                    Adj. R-squared: 0.177
Method:        Least Squares          F-statistic:    1418.
Date:          Sat, 15 Jul 2023        Prob (F-statistic): 0.00
Time:          00:54:12                Log-Likelihood: -13267.
No. Observations: 26304              AIC:            2.654e+04
Df Residuals:  26299                 BIC:            2.658e+04
Df Model:       4
Covariance Type: nonrobust
=====

```

|               | coef    | std err | t       | P> t  | [0.025 | 0.975] |
|---------------|---------|---------|---------|-------|--------|--------|
| const         | 7.4381  | 0.070   | 105.978 | 0.000 | 7.301  | 7.576  |
| precipitation | -0.0135 | 0.002   | -6.412  | 0.000 | -0.018 | -0.009 |
| humidity      | -1.9676 | 0.041   | -48.185 | 0.000 | -2.048 | -1.888 |
| temp_mean     | -0.0891 | 0.002   | -47.680 | 0.000 | -0.093 | -0.085 |
| wind_speed    | -0.4199 | 0.010   | -43.691 | 0.000 | -0.439 | -0.401 |

```

=====
Omnibus:          19.786  Durbin-Watson:      0.230
Prob(Omnibus):    0.000  Jarque-Bera (JB):   22.098
Skew:             -0.019  Prob(JB):           1.59e-05
Kurtosis:         3.137  Cond. No.           724.
=====

```

## Jinja

OLS Regression Results

```

=====
Dep. Variable:  pm2_5_calibrated_value  R-squared:      0.072
Model:          OLS                    Adj. R-squared: 0.072
Method:        Least Squares          F-statistic:    511.8
Date:          Sat, 15 Jul 2023        Prob (F-statistic): 0.00
Time:          00:55:54                Log-Likelihood: -16648.
No. Observations: 26304              AIC:            3.331e+04
Df Residuals:  26299                 BIC:            3.335e+04
Df Model:       4
Covariance Type: nonrobust
=====

```

|               | coef    | std err | t       | P> t  | [0.025 | 0.975] |
|---------------|---------|---------|---------|-------|--------|--------|
| const         | 5.8014  | 0.074   | 77.896  | 0.000 | 5.655  | 5.947  |
| precipitation | -0.0307 | 0.003   | -11.461 | 0.000 | -0.036 | -0.025 |
| humidity      | -1.4058 | 0.047   | -30.011 | 0.000 | -1.498 | -1.314 |
| temp_mean     | -0.0771 | 0.002   | -41.477 | 0.000 | -0.081 | -0.073 |
| wind_speed    | 0.0421  | 0.003   | 16.722  | 0.000 | 0.037  | 0.047  |

```

=====
Omnibus:          520.733  Durbin-Watson:      0.390
Prob(Omnibus):    0.000  Jarque-Bera (JB):   1129.053
Skew:             -0.014  Prob(JB):           6.75e-246
Kurtosis:         4.015  Cond. No.           710.
=====

```

# GENERALISED LINEAR REGRESSION MODEL WITH LINKED GAMMA FUNCTION

## Kampala

Generalized Linear Model Regression Results

```

=====
Dep. Variable:    pm2_5_calibrated_value    No. Observations:    26304
Model:           GLM                      Df Residuals:        26299
Model Family:    Gamma                    Df Model:             4
Link Function:    log                      Scale:                0.17188
Method:          IRLS                     Log-Likelihood:       -1.0879e+05
Date:            Sat, 15 Jul 2023          Deviance:              4209.6
Time:            01:01:45                  Pearson chi2:          4.52e+03
No. Iterations:  100                       Pseudo R-squ. (CS):   0.1837
Covariance Type: nonrobust
=====

```

|               | coef       | std err  | z       | P> z  | [0.025    | 0.975]   |
|---------------|------------|----------|---------|-------|-----------|----------|
| Intercept     | -5.194e+10 | 6.09e+10 | -0.853  | 0.394 | -1.71e+11 | 6.74e+10 |
| precipitation | -0.0147    | 0.002    | -6.726  | 0.000 | -0.019    | -0.010   |
| humidity      | -1.8237    | 0.042    | -43.167 | 0.000 | -1.907    | -1.741   |
| temp_mean     | -0.0915    | 0.002    | -47.305 | 0.000 | -0.095    | -0.088   |
| wind_speed    | -0.3901    | 0.010    | -39.235 | 0.000 | -0.410    | -0.371   |
| intercept     | 5.194e+10  | 6.09e+10 | 0.853   | 0.394 | -6.74e+10 | 1.71e+11 |

## Jinja

Generalized Linear Model Regression Results

```

=====
Dep. Variable:    pm2_5_calibrated_value    No. Observations:    26304
Model:           GLM                      Df Residuals:        26299
Model Family:    Gamma                    Df Model:             4
Link Function:    log                      Scale:                0.25885
Method:          IRLS                     Log-Likelihood:       -99924.
Date:            Sat, 15 Jul 2023          Deviance:              5537.1
Time:            01:01:02                  Pearson chi2:          6.80e+03
No. Iterations:  100                       Pseudo R-squ. (CS):   0.06918
Covariance Type: nonrobust
=====

```

|               | coef       | std err  | z       | P> z  | [0.025    | 0.975]   |
|---------------|------------|----------|---------|-------|-----------|----------|
| Intercept     | -1.282e+10 | 7.47e+10 | -0.172  | 0.864 | -1.59e+11 | 1.34e+11 |
| precipitation | -0.0316    | 0.003    | -10.570 | 0.000 | -0.037    | -0.026   |
| humidity      | -1.3988    | 0.052    | -26.744 | 0.000 | -1.501    | -1.296   |
| temp_mean     | -0.0821    | 0.002    | -39.550 | 0.000 | -0.086    | -0.078   |
| wind_speed    | 0.0346     | 0.003    | 12.314  | 0.000 | 0.029     | 0.040    |
| intercept     | 1.282e+10  | 7.47e+10 | 0.172   | 0.864 | -1.34e+11 | 1.59e+11 |

## Results

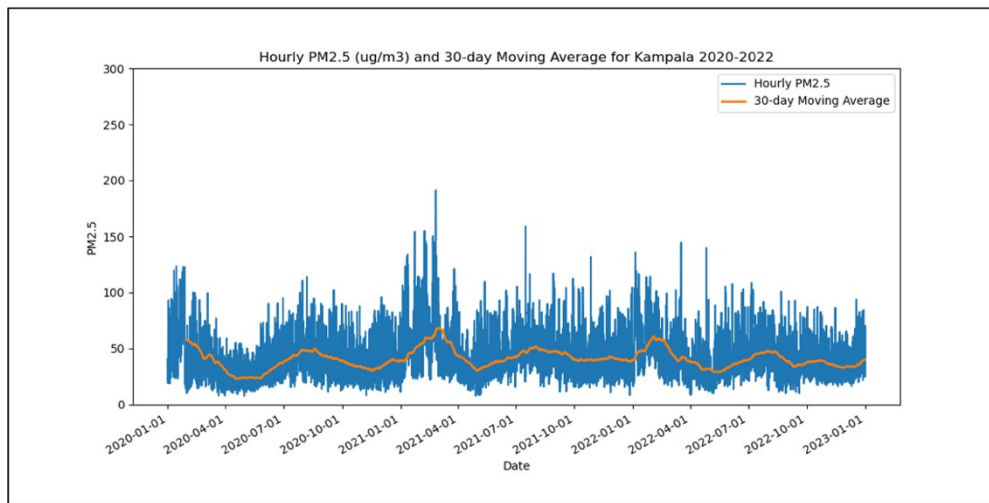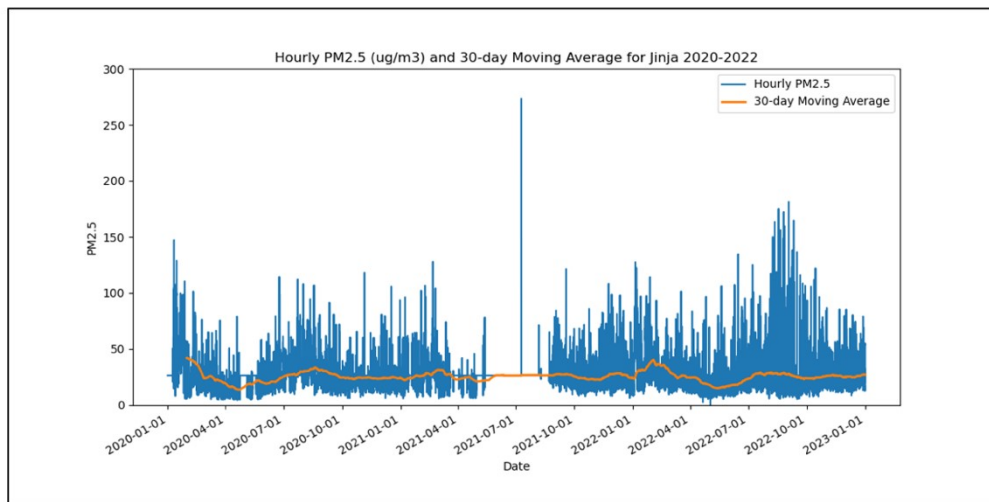

SF 4: Hourly PM<sub>2.5</sub> ( $\mu\text{g}/\text{m}^3$ ) and 30-day Moving Average for Kampala and Jinja from 2020-2022



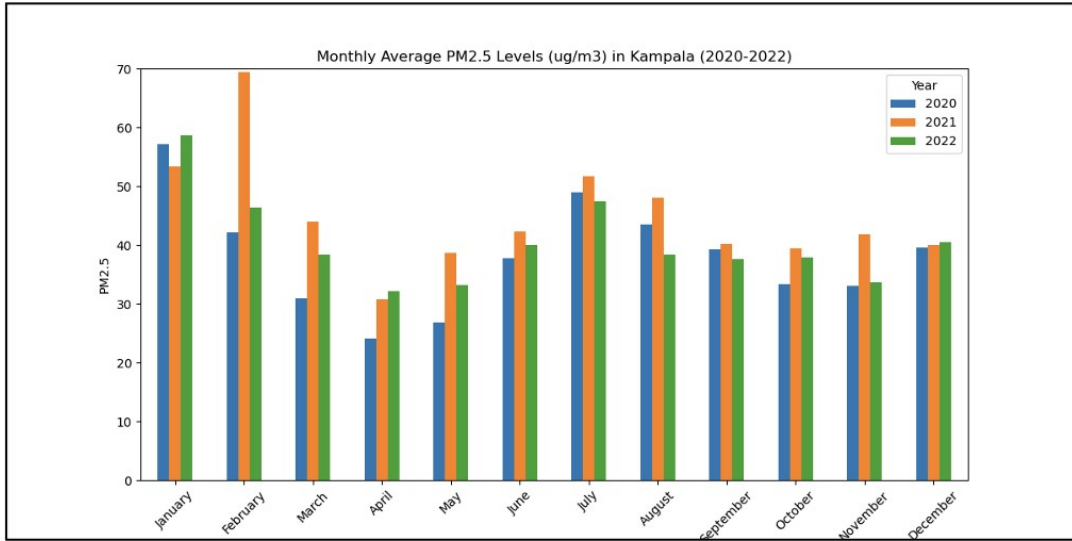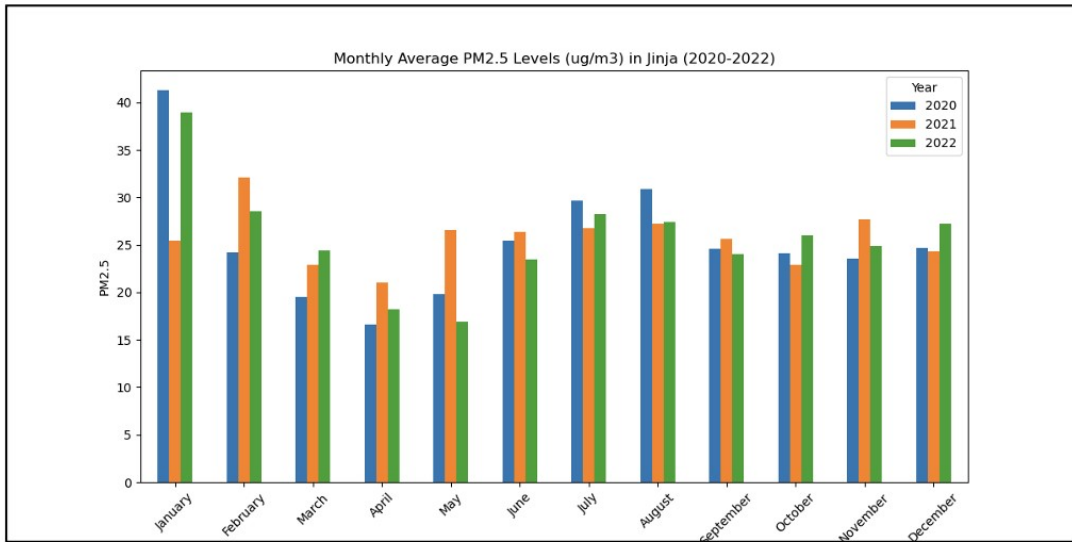

**SF 5:** Temporal Variation of PM<sub>2.5</sub> (μg/m<sup>3</sup>) in Kampala and Jinja from 2020 to 2022

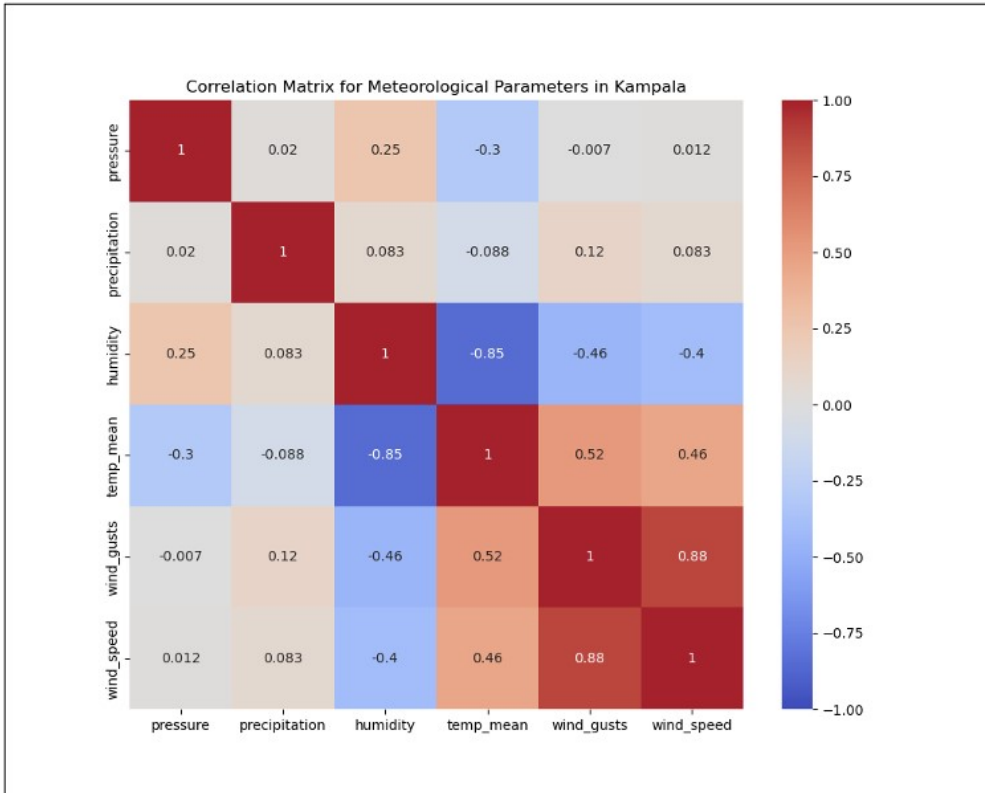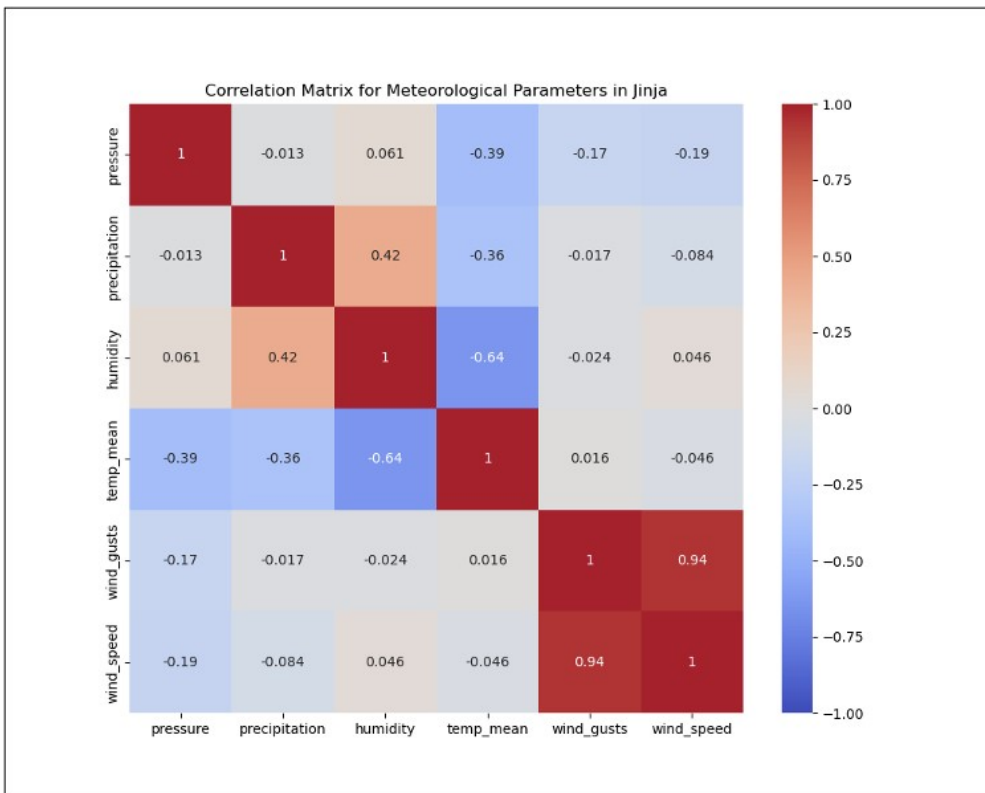

SF6: Correlation Matrix for Meteorological Parameters in Kampala and Jinja
